# Supplementary material for: CRISPR-Cas9-induced t(11;19)/MLL-ENL translocations initiate leukemia in human hematopoietic progenitor cells in vivo
Source: PubMed Central journal article supplement — Haematologica. 2017 Sep;102(9):1558–66. doi: 10.3324/haematol.2017.164046 (PMC5685230; doi:10.3324/haematol.2017.164046), 2017-09
Supplement: 2017_164046-Disclosures_and_Contributions.pdf [file 2017_164046-Disclosures_and_Contributions.pdf]

Haematologica  
HAEMATOL/2017/164046  
Version 5

CRISPR-Cas9-induced t(11;19)/MLL-ENL translocations initiate  
leukemia in human hematopoietic progenitor cells in vivo

Jana Reimer, Sabine Knoess, Maurice Labuhn, Emmanuelle M.  
Charpentier, Gudrun Göhring, Brigitte Schlegelberger, Jan-Henning  
Klusmann, and Dirk Heckl

Disclosures: D.H is supported by the German Cancer Aid (111743). J.H.K. is a fellow of the Emmy Noether-Programme from the DFG (KL-2374/2-1). This work was supported by grants to D.H. and J.H.K. from the DFG (HE-7482/1-1, KL-2374/2-1; KL-2374/1-3) and to G.G. and B.S. for the Cluster of Excellence REBIRTH (DFG, EXC 62/3). J.R. and M.L. were supported by the Hannover Biomedical Research School.

Contributions: Contribution: D.H. and J.H.K. designed and supervised experiments, analyzed and interpreted data, and wrote the manuscript. J.R. and S.K. designed and performed experiments, and analyzed data. M.L. and G.G. performed experiments, and analyzed data. E.M.C. and B.S. interpreted data, and revised the manuscript. All authors have read and discussed the manuscript.
